# Supplementary material for: Mitigation of muscular dystrophy in mice by SERCA overexpression in skeletal muscle
Source: JCI journal article supplement (doi:10.1172/jci43844), 2011-02-01
Supplement: sd1 [file 1]

## Supplemental Figure 1

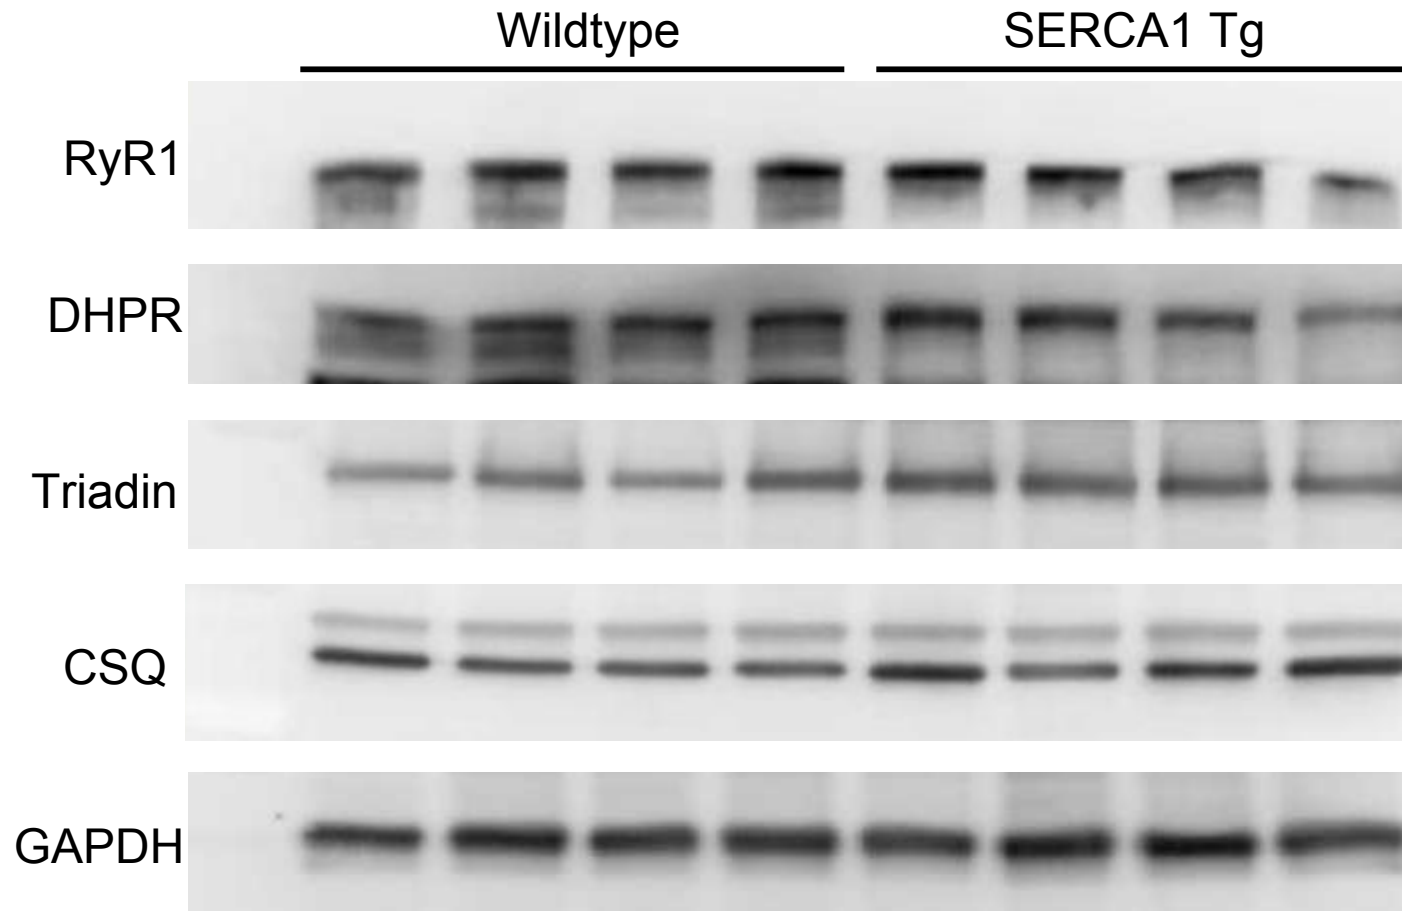

**Supplemental Figure 1.** Western blotting for SR proteins from wildtype skeletal muscle or from SERCA1 Tg mice for each of the indicated proteins (N=4 mice each). Abbreviations: RyR1, ryanodine receptor; DHPR, dihydropyridine receptor (L-type  $\text{Ca}^{2+}$  channel); CSQ, calsequestrin. No significant changes were observed in expression of any protein between Wt and Tg, as assessed after quantitation and statistical analysis.
